# Supplementary material
Source: publisher site journal article supplement (https://www.dovepress.com/article/329055)
Supplement: Supplementary file 1 [file get_supplementary_file.php]

Supplementary Table 1. Summary of analyzed 75 SNPs and response to chemotherapy and survival.

| SNP IDa | Target Gene | miRNA | Alleles | CR (%) | MAF | HWE-*P* | *P* for responseb | | |  | *P* for overall survivalc | | |  | *P* for progression free survivalc | | |
| --- | --- | --- | --- | --- | --- | --- | --- | --- | --- | --- | --- | --- | --- | --- | --- | --- | --- |
|  | | |  |  | | |  |  |  |  |
| Domi. | Rece. | Codo. |  | Domi. | Rece. | Codo. |  | Domi. | Rece. | Codo. |
| rs9523 | *NUP62* | hsa-miR-1914 | AG | 99 | 0.41 | 0.83 | 0.046 | 0.003 | 0.003 |  | 0.647 | 0.003 | 0.060 |  | 0.255 | 0.029 | 0.054 |
| rs2074216 | *DVL2* | has-miR-484 | GA | 96 | 0.36 | 0.54 | 0.203 | 0.894 | 0.312 |  | 0.211 | 0.003 | 0.016 |  | 0.085 | 0.025 | 0.017 |
| rs11541557 | *ARF1* | hsa-miR-92a | GT | 100 | 0.08 | 0.18 | 0.319 | - | 0.319 |  | 0.004 | - | 0.004 |  | <.0001 | - | <.0001 |
| rs2261988 | *UHRF1* | has-miR-615-3p | CA | 100 | 0.13 | 0.65 | 0.262 | 0.461 | 0.225 |  | 0.604 | 0.034 | 0.941 |  | 0.036 | 0.003 | 0.104 |
| rs4705 | *PDGFRL* | hsa-miR-25 | CT | 100 | 0.47 | 0.62 | 0.028 | 0.046 | 0.010 |  | 0.850 | 0.655 | 0.704 |  | 0.084 | 0.182 | 0.061 |
| rs11196251 | *TCF7L2* | hsa-miR-324-5p | CT | 99 | 0.26 | 0.10 | 0.371 | 0.045 | 0.112 |  | 0.114 | 0.573 | 0.358 |  | 0.746 | 0.330 | 0.504 |
| rs1965024 | *SALL1* | hsa-miR-423-5p | TC | 99 | 0.35 | 0.90 | 0.044 | 0.950 | 0.129 |  | 0.707 | 0.430 | 0.503 |  | 0.426 | 0.440 | 0.338 |
| rs3814026 | *ANAPC1* | hsa-miR-744 | TC | 99 | 0.46 | 0.55 | 0.063 | 0.000 | 0.001 |  | 0.623 | 0.290 | 0.367 |  | 0.873 | 0.732 | 0.768 |
| rs7091596 | *PARD3* | hsa-miR-93* | AT | 100 | 0.27 | 0.37 | 0.048 | 0.851 | 0.114 |  | 0.439 | 0.056 | 0.182 |  | 0.066 | 0.004 | 0.011 |
| rs2589668 | *MARCH6* | hsa-let-7b | CT | 99 | 0.23 | 0.38 | 0.068 | 0.979 | 0.142 |  | 0.490 | 0.983 | 0.582 |  | 0.464 | 0.641 | 0.448 |
| rs3212986 | *CD3EAP* | hsa-miR-92a | GT | 99 | 0.29 | 0.86 | 0.380 | 0.680 | 0.384 |  | 0.007 | 0.487 | 0.018 |  | 0.105 | 0.237 | 0.072 |
| rs6934058 | *CDC5L* | hsa-miR-505 | TC | 98 | 0.45 | 0.86 | 0.286 | 0.495 | 0.763 |  | 0.033 | 0.123 | 0.544 |  | 0.127 | 0.065 | 0.981 |
| rs2297441 | *RTEL1* | hsa-miR-615-3p | GA | 98 | 0.31 | 0.86 | 0.365 | 0.174 | 0.985 |  | 0.795 | 0.001 | 0.138 |  | 0.033 | 0.143 | 0.021 |
| rs7097 | *POLR1D* | hsa-miR-374a* | AG | 98 | 0.49 | 0.84 | 0.681 | 0.320 | 0.388 |  | 0.004 | 0.331 | 0.236 |  | 0.129 | 0.976 | 0.368 |
| rs296888 | *HNRNPK* | hsa-miR-615-3p | CT | 100 | 0.27 | 0.77 | 0.709 | 0.475 | 0.554 |  | 0.018 | 0.011 | 0.003 |  | 0.824 | 0.493 | 0.657 |
| rs2295865 | *SUPT16H* | hsa-miR-186 | CA | 98 | 0.13 | 0.31 | 0.373 | 0.987 | 0.330 |  | 0.025 | 0.976 | 0.015 |  | 0.195 | 0.976 | 0.161 |
| rs3762158 | *SUPT16H* | has-miR-484 | GC | 96 | 0.14 | 0.27 | 0.490 | 0.987 | 0.435 |  | 0.025 | 0.977 | 0.016 |  | 0.224 | 0.976 | 0.186 |
| rs1318648 | *ESPL1* | hsa-miR-149 | TG | 100 | 0.28 | 0.24 | 0.549 | 0.537 | 0.467 |  | 0.425 | 0.069 | 0.164 |  | 0.236 | 0.011 | 0.048 |
| rs2228128 | *POLR2A* | has-miR-744 | TC | 96 | 0.07 | 0.24 | 0.241 | 0.987 | 0.232 |  | 0.007 | 0.577 | 0.011 |  | 0.152 | 0.419 | 0.247 |
| rs40311 | *GSPT1* | hsa-miR-183 | GC | 98 | 0.20 | 0.22 | 0.915 | 0.252 | 0.643 |  | 0.808 | 0.289 | 0.583 |  | 0.548 | 0.024 | 0.285 |
| rs4074826 | *HIPK2* | hsa-miR-423-5p | CT | 99 | 0.17 | 0.21 | 0.141 | 0.807 | 0.189 |  | 0.027 | 0.649 | 0.047 |  | 0.385 | 0.749 | 0.532 |
| rs1569238 | *REPS1* | hsa-miR-193b | GA | 96 | 0.21 | 0.19 | 0.152 | 0.977 | 0.114 |  | 0.077 | 0.233 | 0.183 |  | 0.021 | 0.665 | 0.043 |
| rs461155 | *ETS2* | hsa-miR-149 | AG | 99 | 0.50 | 0.41 | 0.572 | 0.107 | 0.188 |  | 0.107 | 0.177 | 0.069 |  | 0.108 | 0.424 | 0.144 |
| rs1047840 | *EXO1* | hsa-miR-30e | GA | 97 | 0.23 | 0.40 | 0.383 | 0.161 | 0.821 |  | 0.615 | 0.102 | 0.938 |  | 0.066 | 0.814 | 0.107 |
| rs3786362 | *TYMS* | hsa-miR-615-3p | TC | 96 | 0.17 | 0.39 | 0.613 | 0.982 | 0.821 |  | 0.172 | 0.033 | 0.098 |  | 0.467 | 0.313 | 0.367 |
| rs3217933 | *CCND2* | hsa-miR-17 | TC | 99 | 0.10 | 0.38 | 0.903 | 0.989 | 0.638 |  | 0.216 | 0.270 | 0.171 |  | 0.052 | 0.929 | 0.073 |
| rs7195830 | *CYBA* | hsa-miR-320a | GA | 99 | 0.23 | 0.98 | 0.403 | 0.452 | 0.698 |  | 0.618 | 0.136 | 0.326 |  | 0.203 | 0.040 | 0.063 |
| rs1111667 | *ERO1LB* | hsa-miR-106b* | AG | 100 | 0.30 | 0.12 | 0.997 | 0.714 | 0.863 |  | 0.087 | 0.061 | 0.032 |  | 0.333 | 0.168 | 0.173 |
| rs480727 | *CDT1* | hsa-miR-20a | GA | 100 | 0.28 | 0.12 | 0.134 | 0.176 | 0.083 |  | 0.017 | 0.651 | 0.157 |  | 0.330 | 0.602 | 0.663 |
| rs1480153 | *PPP2R2B* | hsa-miR-30e* | TC | 96 | 0.46 | 0.86 | 0.612 | 0.113 | 0.220 |  | 0.100 | 0.018 | 0.017 |  | 0.400 | 0.680 | 0.428 |
| rs5744857 | *POLE* | hsa-miR-92a | AG | 99 | 0.30 | 0.99 | 0.904 | 0.991 | 0.930 |  | 0.413 | 0.874 | 0.471 |  | 0.503 | 0.384 | 0.367 |
| rs1136666 | *GAPDH* | has-miR-149 | CG | 98 | 0.23 | 0.96 | 0.374 | 0.979 | 0.180 |  | 0.121 | 0.398 | 0.109 |  | 0.861 | 0.624 | 0.744 |
| rs2269529 | *MYH9* | hsa-miR-1296 | CT | 96 | 0.35 | 0.27 | 0.468 | 0.414 | 0.880 |  | 0.298 | 0.394 | 0.634 |  | 0.776 | 0.184 | 0.424 |
| rs8444 | *LASS2* | hsa-miR-20a | CT | 98 | 0.40 | 0.89 | 0.152 | 0.475 | 0.167 |  | 0.285 | 0.701 | 0.582 |  | 0.582 | 0.678 | 0.863 |
| rs157705 | *MAP3K7* | hsa-miR-1226* | GA | 98 | 0.30 | 0.86 | 0.470 | 0.545 | 0.408 |  | 0.822 | 0.628 | 0.696 |  | 0.507 | 0.270 | 0.312 |
| rs989902 | *PTPN13* | hsa-miR-186 | AC | 98 | 0.42 | 0.83 | 0.347 | 0.677 | 0.383 |  | 0.743 | 0.841 | 0.742 |  | 0.830 | 0.436 | 0.569 |
| rs16855615 | *CCNT2* | hsa-miR-484 | GA | 99 | 0.26 | 0.81 | 0.613 | 0.809 | 0.614 |  | 0.371 | 0.836 | 0.555 |  | 0.173 | 0.340 | 0.138 |
| rs1049910 | *LMNB2* | hsa-miR-193b | CG | 98 | 0.31 | 0.81 | 0.320 | 0.862 | 0.506 |  | 0.420 | 0.791 | 0.662 |  | 0.055 | 0.822 | 0.208 |
| rs7488 | *TPP1* | hsa-miR-877 | AG | 99 | 0.11 | 0.79 | 0.503 | 0.987 | 0.638 |  | 0.531 | 0.522 | 0.698 |  | 0.141 | 0.364 | 0.300 |
| rs1707303 | *PIK3R3* | hsa-miR-346 | GT | 100 | 0.27 | 0.76 | 0.333 | 0.326 | 0.738 |  | 0.540 | 0.799 | 0.572 |  | 0.148 | 0.830 | 0.337 |
| rs12449580 | *AIPL1* | has-miR-3615 | CG | 100 | 0.43 | 0.75 | 0.917 | 0.285 | 0.500 |  | 0.013 | 0.300 | 0.030 |  | 0.251 | 0.709 | 0.350 |
| rs1061157 | *BMPR2* | hsa-miR-93* | GA | 100 | 0.09 | 0.72 | 0.163 | 0.988 | 0.159 |  | 0.128 | 0.764 | 0.197 |  | 0.361 | 0.998 | 0.410 |
| rs10467153 | *DYRK2* | hsa-miR-378 | TC | 98 | 0.44 | 0.70 | 0.139 | 0.117 | 0.909 |  | 0.631 | 0.651 | 0.956 |  | 0.042 | 0.319 | 0.059 |
| rs3826810 | *LDLR* | hsa-miR-92a | GA | 98 | 0.08 | 0.67 | 0.927 | 0.164 | 0.774 |  | 0.992 | 0.163 | 0.858 |  | 0.640 | 0.435 | 0.739 |
| rs1049434 | *SLC16A1* | hsa-miR-615-3p | AT | 99 | 0.37 | 0.64 | 0.801 | 0.416 | 0.554 |  | 0.287 | 0.825 | 0.516 |  | 0.523 | 0.481 | 0.422 |
| rs1056471 | *HADHB* | hsa-miR-99a | GC | 100 | 0.15 | 0.64 | 0.135 | 0.982 | 0.114 |  | 0.107 | 0.635 | 0.108 |  | 0.928 | 0.765 | 0.875 |
| rs1653586 | *CAMKK2* | hsa-miR-185 | GT | 100 | 0.09 | 0.61 | 0.113 | 0.991 | 0.113 |  | 0.737 | - | 0.737 |  | 0.246 | 0.984 | 0.252 |
| rs1140034 | *ADCK2* | has-let-7b | TC | 99 | 0.08 | 0.60 | 0.608 | 0.216 | 0.421 |  | 0.101 | 0.365 | 0.084 |  | 0.361 | 0.256 | 0.273 |
| rs20554 | *EP300* | hsa-miR-23b | GA | 99 | 0.14 | 0.59 | 0.871 | 0.407 | 0.947 |  | 0.317 | 0.075 | 0.566 |  | 0.504 | 0.041 | 0.777 |
| rs362331 | *HTT* | has-let-7b | TC | 98 | 0.44 | 0.57 | 0.762 | 0.722 | 0.994 |  | 0.730 | 0.991 | 0.812 |  | 0.908 | 0.968 | 0.954 |
| rs7081076 | *SORBS1* | hsa-miR-320a | CA | 100 | 0.12 | 0.57 | 0.857 | 0.675 | 0.774 |  | 0.283 | 0.048 | 0.166 |  | 0.465 | 0.238 | 0.339 |
| rs1013062 | *DEK* | hsa-miR-96 | CT | 99 | 0.33 | 0.56 | 0.908 | 0.254 | 0.527 |  | 0.591 | 0.226 | 0.332 |  | 0.613 | 0.648 | 0.547 |
| rs1805329 | *RAD23B* | hsa-miR-92a | CT | 100 | 0.18 | 0.54 | 0.675 | 0.465 | 0.542 |  | 0.385 | 0.891 | 0.533 |  | 0.418 | 0.728 | 0.595 |
| rs2290890 | *SYK* | hsa-miR-99b* | GA | 98 | 0.21 | 0.54 | 0.861 | 0.763 | 0.801 |  | 0.477 | 0.372 | 0.354 |  | 0.143 | 0.395 | 0.122 |
| rs6698826 | *RAB3B* | hsa-miR-27b | CA | 98 | 0.14 | 0.53 | 0.440 | 0.985 | 0.374 |  | 0.154 | 0.647 | 0.155 |  | 0.769 | 0.550 | 0.929 |
| rs1051709 | *PTK7* | hsa-miR-193b | TC | 100 | 0.41 | 0.52 | 0.980 | 0.109 | 0.360 |  | 0.203 | 0.696 | 0.258 |  | 0.084 | 0.510 | 0.386 |
| rs2230724 | *JAK2* | hsa-miR-16 | GA | 99 | 0.43 | 0.52 | 0.676 | 0.234 | 0.691 |  | 0.771 | 0.449 | 0.791 |  | 0.633 | 0.068 | 0.177 |
| rs2229534 | *ACADS* | hsa-miR-92a | GA | 100 | 0.23 | 0.51 | 0.531 | 0.978 | 0.228 |  | 0.561 | 0.389 | 0.421 |  | 0.513 | 0.941 | 0.568 |
| rs2288539 | *NR2F6* | has-miR-196a | CT | 100 | 0.15 | 0.50 | 0.904 | 0.724 | 0.999 |  | 0.769 | 0.908 | 0.773 |  | 0.886 | 0.440 | 0.723 |
| rs6573 | *RAP1A* | hsa-let-7e | CA | 97 | 0.05 | 0.49 | 0.982 | 0.991 | 0.920 |  | 0.125 | 0.815 | 0.153 |  | 0.046 | 0.372 | 0.071 |
| rs4919551 | *BTRC* | hsa-let-7e | CG | 99 | 0.09 | 0.48 | 0.428 | 0.991 | 0.406 |  | 0.138 | 0.495 | 0.185 |  | 0.517 | 0.929 | 0.527 |
| rs2076345 | *TCEB3* | hsa-miR-320b | CT | 96 | 0.24 | 0.44 | 0.421 | 0.511 | 0.355 |  | 0.645 | 0.849 | 0.767 |  | 0.158 | 0.945 | 0.237 |
| rs1136613 | *KPNB1* | hsa-miR-484 | GA | 99 | 0.11 | 0.37 | 0.694 | 0.572 | 0.606 |  | 0.631 | 0.942 | 0.667 |  | 0.805 | 0.689 | 0.739 |
| rs3203733 | *MTUS1* | hsa-miR-1296 | AG | 99 | 0.23 | 0.36 | 0.844 | 0.664 | 0.991 |  | 0.420 | 0.241 | 0.266 |  | 0.562 | 0.363 | 0.428 |
| rs4485435 | *FASN* | hsa-miR-326 | GC | 100 | 0.16 | 0.35 | 0.365 | 0.910 | 0.415 |  | 0.260 | 0.420 | 0.553 |  | 0.212 | 0.255 | 0.146 |
| rs14235 | *BCKDK* | hsa-miR-92b | AG | 98 | 0.06 | 0.34 | 0.319 | - | 0.319 |  | 0.911 | - | 0.911 |  | 0.067 | - | 0.067 |
| rs7654 | *TPM3* | hsa-miR-615-3p | CA | 99 | 0.06 | 0.33 | 0.527 | - | 0.527 |  | 0.574 | - | 0.574 |  | 0.250 | - | 0.250 |
| rs2854464 | *ACVR1B* | hsa-miR-182 | AG | 100 | 0.41 | 0.32 | 0.314 | 0.299 | 0.905 |  | 0.862 | 0.279 | 0.490 |  | 0.756 | 0.903 | 0.786 |
| rs1043805 | *FKBP5* | hsa-miR-93* | TA | 99 | 0.13 | 0.26 | 0.111 | 0.988 | 0.106 |  | 0.767 | 0.761 | 0.727 |  | 0.751 | 0.375 | 0.586 |
| rs3088440 | *CDKN2A* | hsa-miR-10b | GA | 100 | 0.09 | 0.17 | 0.449 | - | 0.449 |  | 0.558 | - | 0.558 |  | 0.830 | - | 0.830 |
| rs2071504 | *POLR2A* | hsa-miR-652 | CT | 100 | 0.19 | 0.17 | 0.751 | 0.980 | 0.993 |  | 0.273 | 0.345 | 0.211 |  | 0.170 | 0.420 | 0.321 |
| rs2306409 | *GTPBP4* | hsa-miR-16 | TC | 100 | 0.41 | 0.13 | 0.756 | 0.574 | 0.923 |  | 0.573 | 0.866 | 0.774 |  | 0.240 | 0.301 | 0.177 |
| rs2230738 | *ADCY9* | hsa-miR-877* | AG | 99 | 0.34 | 0.08 | 0.550 | 0.855 | 0.609 |  | 0.924 | 0.754 | 0.928 |  | 0.775 | 0.755 | 0.723 |
| rs2276075 | *HSPA8* | has-miR-149 | GA | 82 | 0.07 | 0.20 | 0.811 | 0.986 | 0.999 |  | 0.790 | 0.980 | 0.932 |  | 0.746 | 0.737 | 0.705 |
| rs9479 | *PML* | hsa-miR-378 | GA | 65 | 0.35 | 0.69 | 0.349 | 0.147 | 0.168 |  | 0.998 | 0.843 | 0.924 |  | 0.175 | 0.764 | 0.414 |

Abbreviation: CR, call rate; MAF, minor allele frequency; HWE, Hardy-Weinberg equilibrium; Domi, dominant; Rece, recessive; and Codo, codominant.

a Information about SNPs and SNP ID were obtained from NCBI database (http://ncbi.nih.gov). The transcription start site was counted as +1 in reference sequences.

b *P* values were calculated by multivariate regression analysis, adjusted for age, gender, smoking status, stage, ECOG performance status, and weight loss.

c *P* values were calculated using multivariate Cox proportional hazard models, adjusted for age, gender, smoking status, stage, ECOG performance status, and weight loss.

* passenger strand

| Supplementary Table 2. Combined effects of 4 SNPs on clinical outcomes of EGFR-TKIs | | | | | | | | | | | | |
| --- | --- | --- | --- | --- | --- | --- | --- | --- | --- | --- | --- | --- |
|  |  |  | Response to EGFR-TKI | | | |  | Overall survival | |  | Progression-free survival | |
| No. of bad genotype | No. (%)a |  | responders  *n* (%)b | non-responders *n* (%)b | OR (95% CI)c | *P*c |  | HR (95% CI)d | *P*d |  | HR (95% CI)d | *P*d |
| 0 | 129 (63.2) |  | 112(86.8) | 17(13.2) | 1.00 |  |  | 1.00 |  |  | 1.00 |  |
| 1 | 57(27.9) |  | 51(89.5) | 6(10.5) | 1.28(0.47-3.52) | 0.630 |  | 2.15(1.41-3.26) | 0.0003 |  | 1.58(1.09-2.29) | 0.016 |
| 2 | 16(7.8) |  | 10(62.5) | 6(37.5) | 0.20(0.06-0.66) | 0.008 |  | 3.20(1.76-5.81) | 0.0001 |  | 3.81(2.18-6.67) | <.0001 |
| 3 | 2 (1.1) |  | 1(50.0) | 1(50.0) | 0.14(0.01-2.48) | 0.181 |  | 5.77(1.29-25.9) | 0.022 |  | 31.4(6.45-152.6) | <.0001 |
| *Ptrend*e |  |  |  |  |  | 0.031 |  |  | <.0001 |  |  | <.0001 |
| 0 | 129(63.2) |  | 112(86.8) | 17(13.2) | 1.00 |  |  | 1.00 |  |  | 1.00 |  |
| 1-3 | 75(36.8) |  | 62(82.7) | 13(17.3) | 0.70(0.31-1.56) | 0.377 |  | 2.38(1.62-3.50) | <.0001 |  | 1.93(1.38-2.70) | 0.0001 |
| Abbreviation: OR, odds ratio; CI, confidence interval; HR, hazard ratio.  a Column percentage.  b Row percentage.  c OR, 95% CI, and their corresponding *P* values were calculated by multivariate regression analysis, adjusted for age, gender, smoking status, stage, ECOG performance status,  and weight loss.  d HRs, 95% CIs and their corresponding *P* values were calculated using multivariate Cox proportional hazard model, adjusted for age, gender, smoking status, stage,  ECOG performance status, and weight loss.  e *Ptrend* for the additive model.  Bad genotypes : rs9523 GG, rs2074216 AA, rs11541557 GT+TT, and rs2261988 AA | | | | | | | | | | | | |
